# Supplementary material for: Statistical Coupling Analysis Predicts Correlated Motions in Dihydrofolate Reductase
Source: PubMed Central journal article supplement (PMC11514014; doi:10.1021/acs.jpcb.4c04195), 2024-10-10
Supplement: jp4c04195_si_001.pdf [file jp4c04195_si_001.pdf]

# Supporting Information: Statistical Coupling Analysis Predicts Correlated Motions in Dihydrofolate Reductase

Thomas L. Kalmer,<sup>\*1</sup> Christine Mae F. Ancajas,<sup>\*1</sup> Cameron I. Cohen,<sup>2,3</sup> Jade M. McDaniel,<sup>2</sup> Abiodun S. Oyedele,<sup>1</sup> Hannah L. Thirman,<sup>4,5,6,7</sup> Allison S. Walker<sup>1,2,5,8 #</sup>

\* Authors contributed equally

# Corresponding author: [allison.s.walker@vanderbilt.edu](mailto:allison.s.walker@vanderbilt.edu)

1. Department of Chemistry, Vanderbilt University Nashville, TN, USA
2. Department of Biological Sciences, Vanderbilt University, Nashville, TN, USA
3. Center for Structural Biology, Vanderbilt University, Nashville, TN, USA
4. Department of Cell and Developmental Biology, Vanderbilt University, Nashville, TN, USA
5. Department of Pathology, Microbiology and Immunology, Vanderbilt University Medical Center, Nashville, TN, USA
6. Vanderbilt Center for Immunobiology, Vanderbilt University Medical Center, Nashville, TN, USA
7. Chemical & Physical Biology Program, Vanderbilt University, Nashville, TN, USA
8. Evolutionary Studies Initiative, Vanderbilt University, Nashville, TN, USA

**Table S1.** *E. coli* IC residue compositions at cutoff = 0.95.

|     | ecDHFR residues                                                   |
|-----|-------------------------------------------------------------------|
| IC1 | 13,23,25,27,32,39,55,63,71,107,133,153                            |
| IC2 | 7,14,15,31,35,42,43,44,46,49,53,54,57,59,94,95,96,100,113,122,126 |
| IC3 | 21,22,24,50,52,64,81,121,                                         |
| IC4 | 5,6,11,18,40,45,47,51,92,111,125,                                 |

**Table S2.** Within variant p-values from Mann-Whitney U tests of dynamic correlations for *E. coli* DHFR.

| Comparison Category | 3QL3 | 3QLO |
|---------------------|------|------|
|                     |      |      |

|                         |             |             |
|-------------------------|-------------|-------------|
| IC1 vs No IC            | 0.44296     | 0.02679     |
| IC2 vs No IC            | 1.79839e-08 | 0.00922     |
| IC3 vs No IC            | 0.04803     | 0.10210     |
| IC4 vs No IC            | 0.04503     | 0.21941     |
| IC1 vs Not in Same IC   | 0.61656     | 0.02452     |
| IC2 vs Not in Same IC   | 1.29761e-07 | 0.00663     |
| IC3 vs Not in Same IC   | 0.07079     | 0.10267     |
| IC4 vs Not in Same IC   | 0.07716     | 0.25263     |
| Any IC vs No IC         | 3.45887e-18 | 9.41947e-05 |
| Not in Same IC vs No IC | 0.09708     | 0.67440     |

**Table S3.** Across variant p-values from Mann-Whitney U tests of dynamic correlations for *E. coli* DHFR.

| <b>Comparison Category</b> | <b>Comparison</b> |
|----------------------------|-------------------|
| IC1 (3QL3) vs IC1 (3QL0)   | 0.00283           |
| IC2 (3QL3) vs IC2 (3QL0)   | 6.17574e-12       |

|                                                |              |
|------------------------------------------------|--------------|
| IC3 (3QL3) vs IC3 (3QL0)                       | 0.03087      |
| IC4 (3QL3) vs IC4 (3QL0)                       | 2.43828e-06  |
| Any IC (3QL3) vs Any IC (3QL0)                 | 1.09078e-70  |
| No IC (3QL3) vs No IC (3QL0)                   | 7.79406e-193 |
| Not in Same IC (3QL3) vs Not in Same IC (3QL0) | 0.00000e+00  |

**Table S4.** Human DHFR IC residue compositions at cutoff = 0.95.

|     | Human DHFR residues                                                  |
|-----|----------------------------------------------------------------------|
| IC1 | 15,26,28,30,35,47,49,68,76,85,128,156,179                            |
| IC2 | 9,16,17,34,38,52,53,54,56,59,66,67,70,72,115,116,117,121,136,145,149 |
| IC3 | 23,24,27,60,65,77,96,144                                             |
| IC4 | 7,8,13,20,50,55,57,61,113,134,148                                    |

**TableS5.** Proteins for which the Met20 Pro-Pro motif was present in our original alignment and which did not possess either the Gly20 mutation or the exact 61-PEKN-65 mutation. PFAM protein accession numbers are in the first column with common or scientific names available in the second column.

| PFAM accession | Name                                                                  | Gly20 | Met20 Loop motif | P61-N65 |
|----------------|-----------------------------------------------------------------------|-------|------------------|---------|
| R7UI73         | <i>Capitella teleta</i><br>(Polychaete worm)                          | C     | PP               | GEEE    |
| U6GUT1         | <i>Eimeria acervulina</i><br>(Coccidian parasite)                     | N     | PP               | empty   |
| S7NYA8         | brandts bat                                                           | G     | PP               | PKKN    |
| G1QES9         | little brown bat                                                      | G     | PP               | PKKN    |
| L5KJI5         | black flying fox                                                      | G     | PP               | PKKN    |
| S7NHW6         | brandts bat                                                           | G     | PP               | PKKN    |
| M1VWK3         | <i>claviceps purpurea</i> (ergot)                                     | G     | PP               | PPSF    |
| A0A2Z5U771     | <i>Rhinolophus gammaherpesvirus 1</i><br>(from greater horseshoe bat) | G     | PP               | PTKS    |
| A0A3L8S6E8     | <i>Chloebia gouldiae</i><br>(Gouldian finch)                          | G     | PP               | PEKS    |

|        |                                                               |   |    |      |
|--------|---------------------------------------------------------------|---|----|------|
| U3IIA3 | <i>Anas platyrhynchos platyrhynchos</i><br>(Northern mallard) | G | PP | PEKH |
|--------|---------------------------------------------------------------|---|----|------|

**Table S6.** Within variant p-values from Mann-Whitney U tests of dynamic correlations for the human variant (4M6K). The “original MSA” represents p-values for the first conserved network identified in human DHFR and the “biased MSA” column represents.

| <b>Comparison Category</b> | <b>4M6K Original MSA</b> | <b>4M6K Biased MSA</b> |
|----------------------------|--------------------------|------------------------|
| IC1 vs No IC               | 0.67861                  | 0.06398                |
| IC2 vs No IC               | 0.99219                  | 1.79859e-04            |
| IC3 vs No IC               | 0.89580                  | 0.00937                |
| IC4 vs No IC               | 0.54960                  | 0.57547                |
| IC1 vs Not in Same IC      | 0.99119                  | 0.12690                |
| IC2 vs Not in Same IC      | 0.58259                  | 5.90955e-05            |
| IC3 vs Not in Same IC      | 0.89361                  | 0.07172                |
| IC4 vs Not in Same IC      | 0.75002                  | 0.40275                |
| Any IC vs No IC            | 0.23658                  | 2.68604e-05            |

|                         |         |         |
|-------------------------|---------|---------|
|                         |         |         |
| Not in Same IC vs No IC | 0.01681 | 0.00363 |

**Table S7.** New Human DHFR IC residue compositions at cutoff = 0.95. SCA was performed on the original MSA which was created by removing sequences with less than 40% sequence similarity to *hDHFR*.

|     | New Human DHFR residues                                                              |
|-----|--------------------------------------------------------------------------------------|
| IC1 | 8,83,86,87,110,128,134,135,148,156                                                   |
| IC2 | 50,52,54,55,56,60,65,70,72,182                                                       |
| IC3 | 7,9,15,16,17,20,22,23,24,27,34,38,48,53,61,66,67,116,117,121,136,142,144,145,147,149 |
| IC4 | 30,69,113,138,174,175,177                                                            |
| IC5 | 31,57,59,63,64,76,115                                                                |
| IC6 | 11,13,37,114,118,125,129,132,146,170,171,172,173,179,181,183                         |

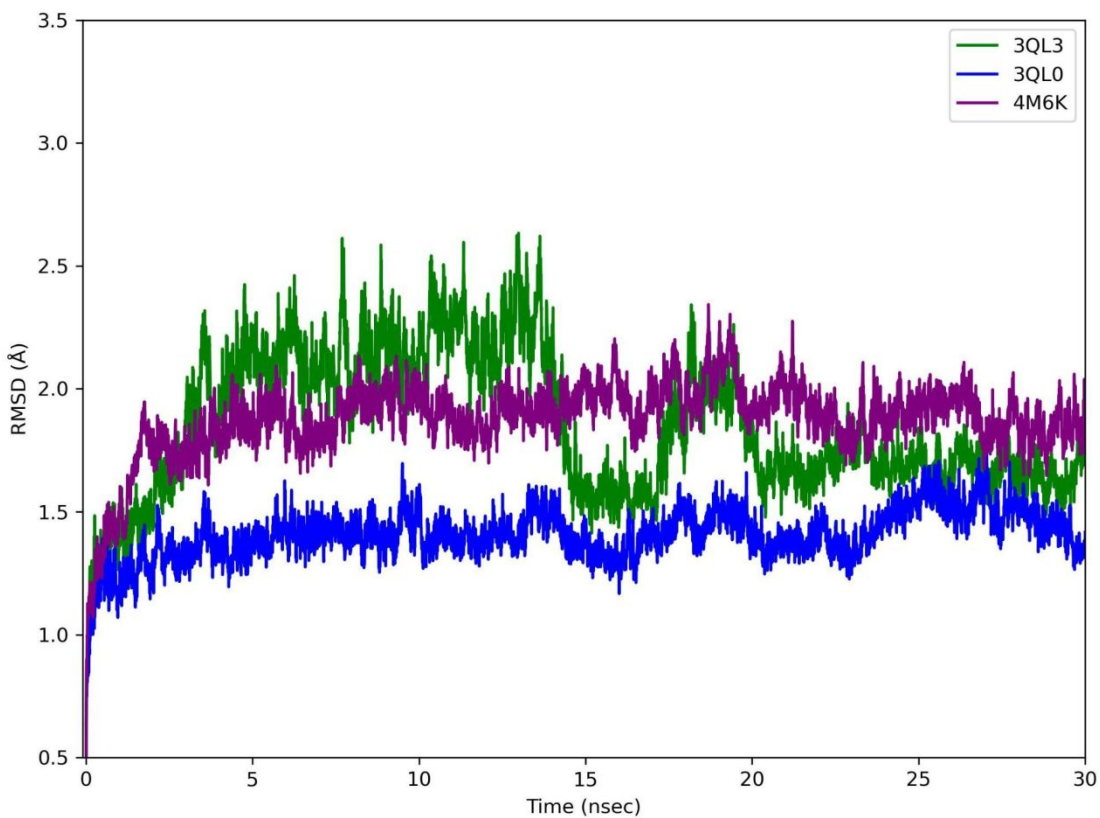

**Figure S1.** The root-mean squared deviation (RMSD) of human DHFR (4M6K, red), wild-type ecDHFR (3QL3, green), and mutant ecDHFR (3QL0, blue) with respect to their initial structures over the duration of 30 ns simulation.

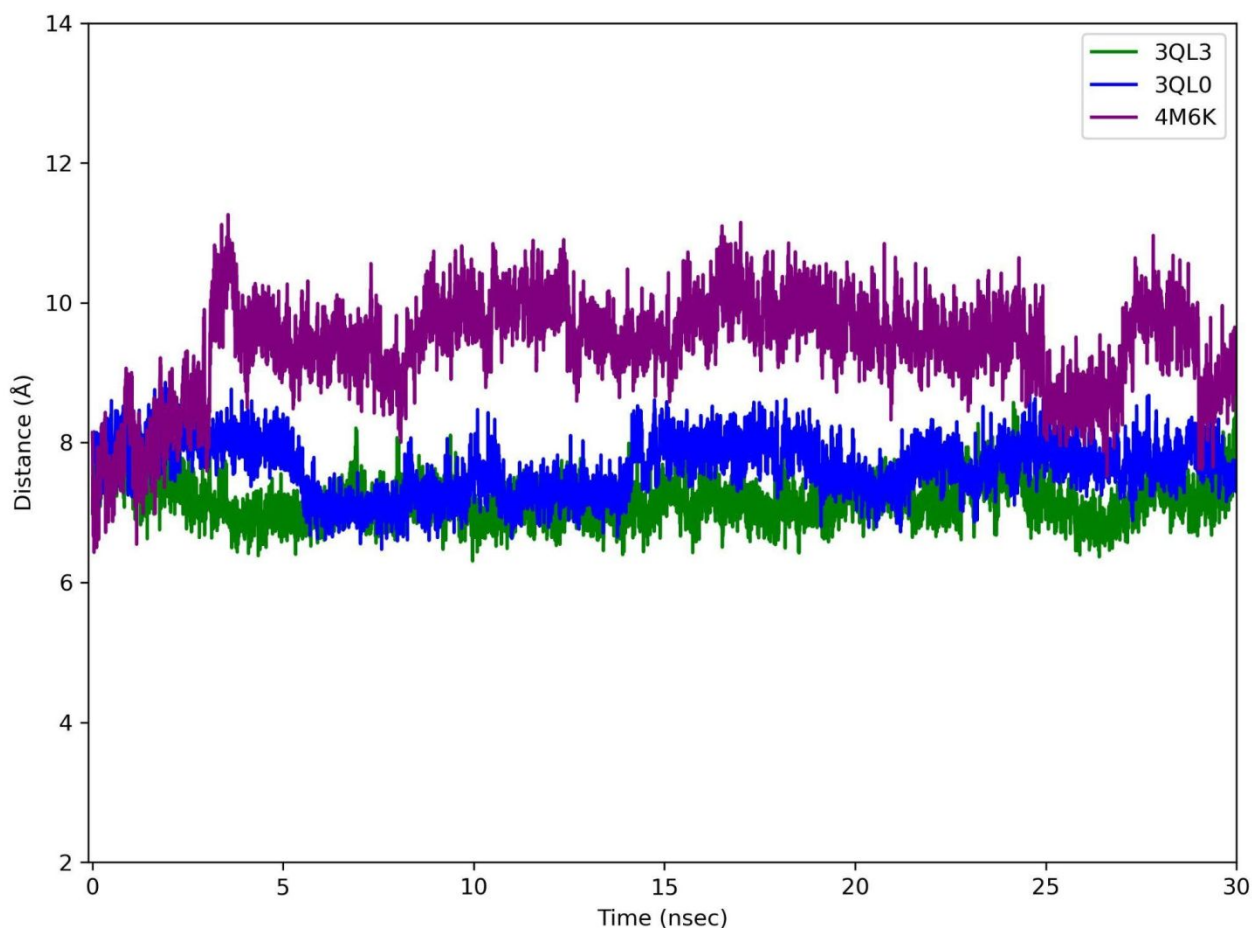

**Figure S2.** The distance between the folate ligand and a residue in the active site of wild-type ecDHFR (green), mutant ecDHFR (blue), and *h*DHFR (red) over the course of 30ns simulation.

### Simulation stability.

Figure S1 monitors the RMSD of the proteins with respect to the first frame of the trajectory over the simulation time. Simulations of the mutant ecDHFR and *h*DHFR are shown to be reasonably stable, with fluctuations gradually increasing then stabilizing at approximately 1.4 and 1.9 Å, respectively, starting at around 5 ns. On the other hand, the wild-type ecDHFR exhibited larger fluctuations. Further analysis suggests that these fluctuations reflect the structural flexibility especially the Met20 loop and its hinge motion of the wild-type ecDHFR in comparison to the other DHFR simulations (**Figures S3 and S5**). The wild-type ecDHFR sampled structures closer to the open state where the RMSD values were greater than  $\sim 1.8$  Å (at around 5-13ns and 18-20ns) and resemble the closed state below  $\sim 1.8$  Å (at around 14-18ns) (**Figure S6**). Distance between the folate ligand and a residue in the DHFR active site (positions K32 in ecDHFR and Q35 in *h*DHFR) from center of mass was also calculated to monitor the stability of the ligand-amino acid interaction during the simulation. **Figure S2** shows this distance averages at around 7.2 to 7.6 Å for wild-type and mutant ecDHFR, respectively, and around 9.3 Å for *h*DHFR.

Fluctuations are within a range of 2 Å, suggesting relative stability of this interaction throughout the simulation.

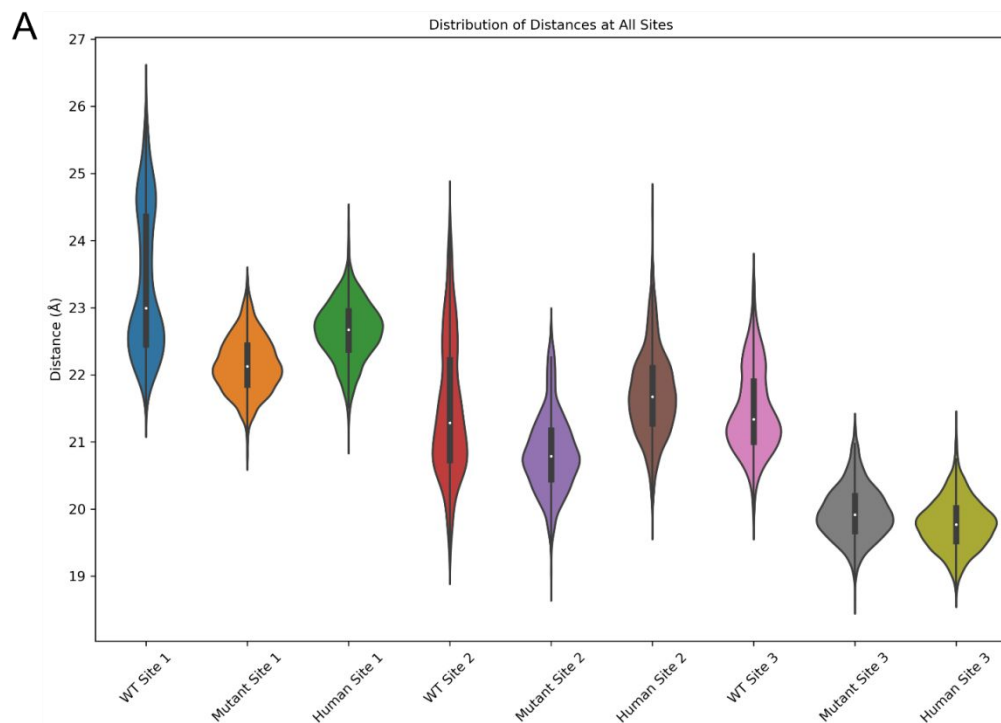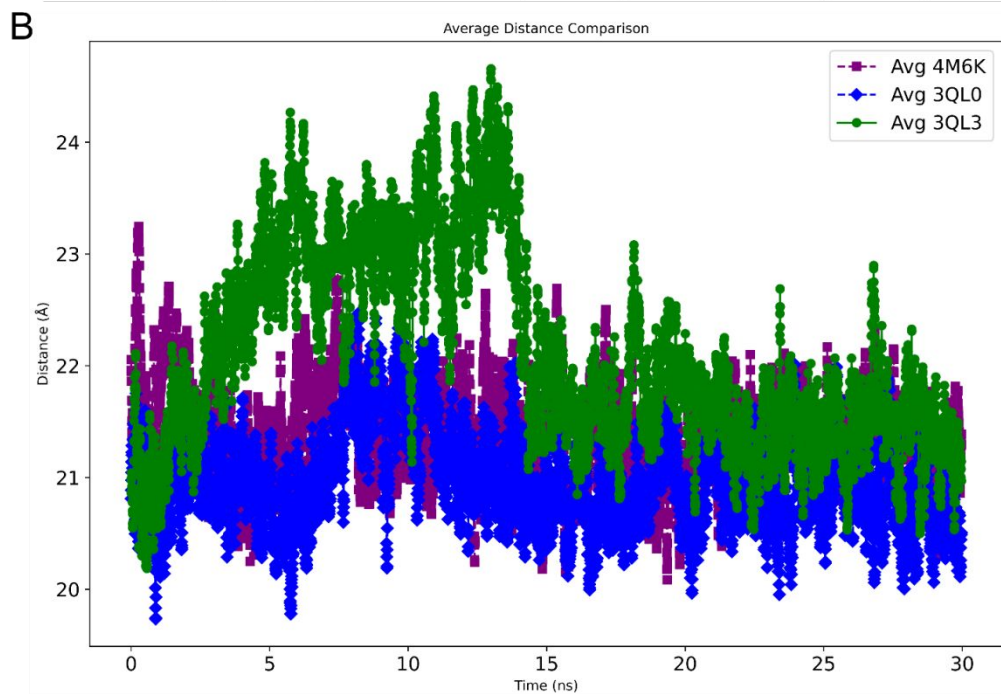



**Figure S3.** Distribution of hinge distances at three different sites in *ecDHFR* and *hDHFR* (**A**). Wild-type hinge distance were averaged between positions W22-P53, N23-P53 and L24-P53 (Site 1-3, respectively) while mutant hinge distance is the average of the distance between positions W22-P54, P23-P54 and L25-P54 (Site 1-3, respectively). Human DHFR hinge distance was averaged between positions W24-P66, P25-P66, and L27-P66 (Site 1-3, respectively). Hinge distance average of the three sites for wild-type (green) and mutant *ecDHFR* (blue) and *hDHFR* (purple) (**B**). All measurements were taken at the alpha carbon and measured throughout the 30ns simulation.

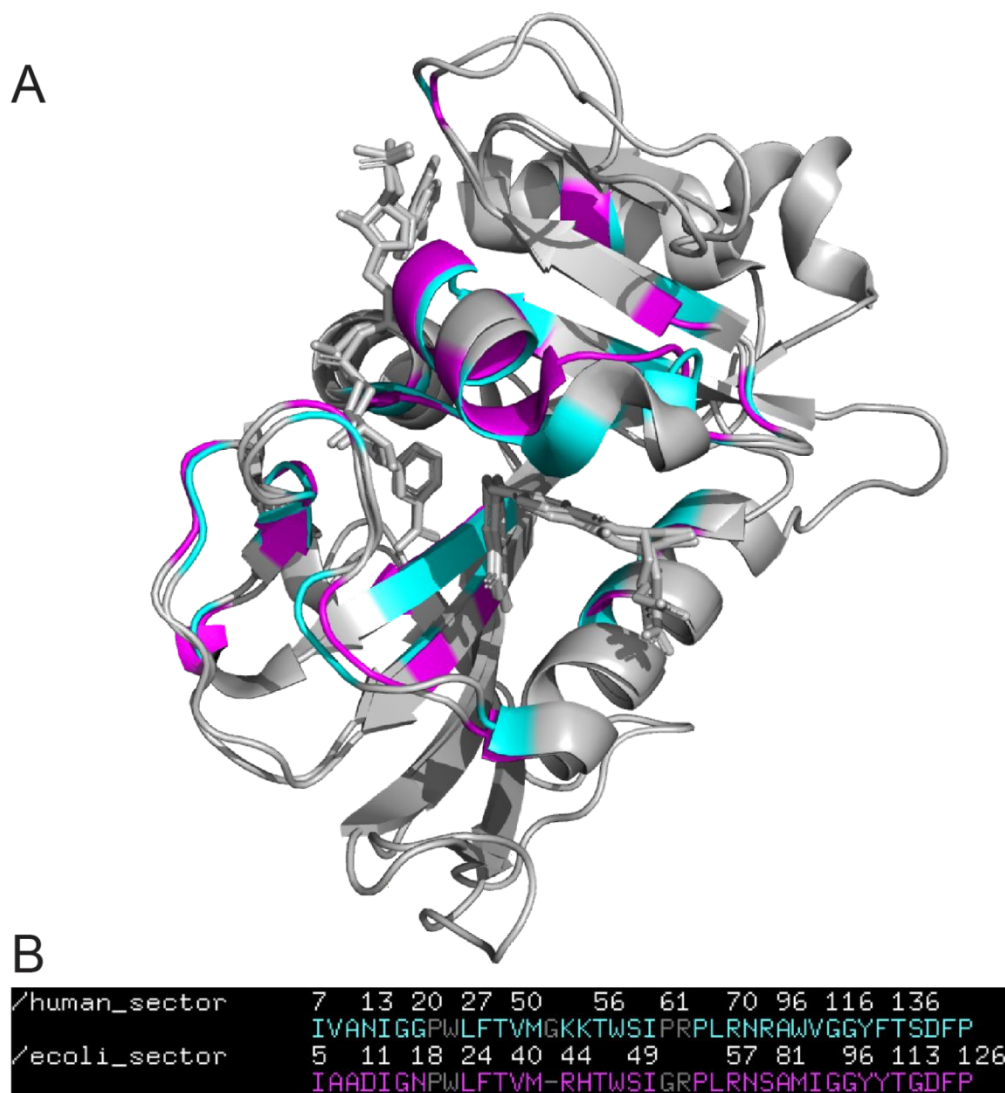

**Figure S4.** Overlaid PDB structures for human (PDB:4M6K) and *E. coli* (PDB:3QL3) DHFR (**A**) along with the structure-based alignment of their sectors (ICs 2-4) (**B**). The RMSD for the structure-based alignment was 0.853Å after 5 cycles with a total of 42 rejected atoms. Numbering is only accurate for the amino acid over which it appears and is meant as a reference for the others.

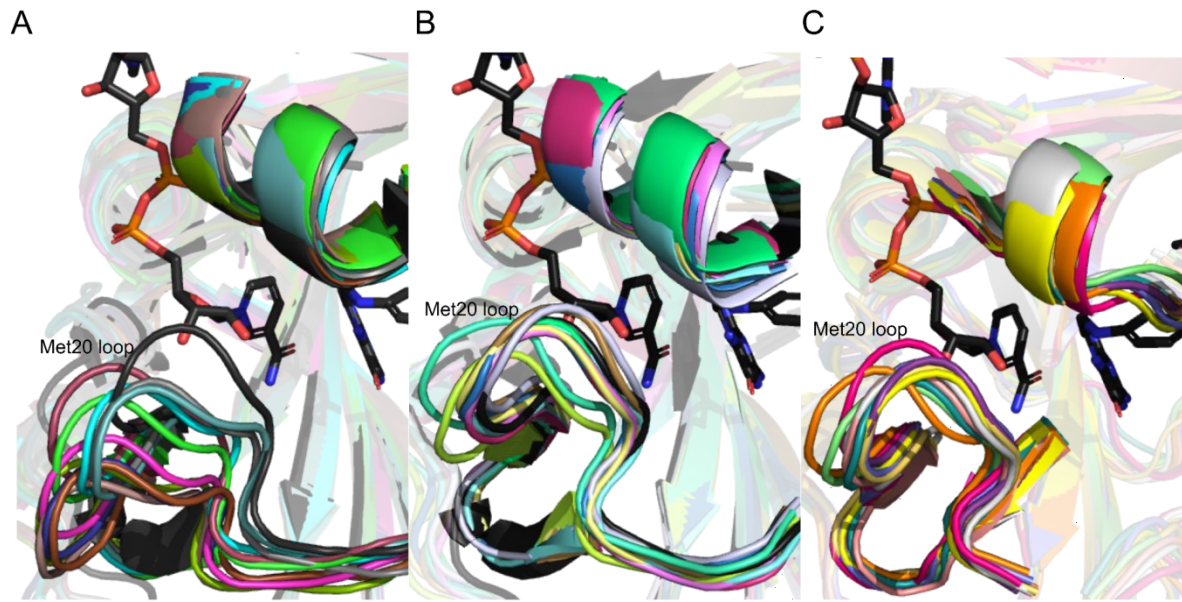

**Figure S5.** Top ten representative conformations throughout the 30ns simulation adopted by wild-type ecDHFR (**A**), mutant ecDHFR (**B**), and human DHFR, highlighting the Met20 loop and alpha-helix containing eSer49 and hSer59. Structures were obtained by *cptraj* K-means algorithm clustering using the options “cluster c1 kmeans clusters 10 randpoint maxit 500 rms :1-159@C,N,O,CA,CB&!@H= sieve 10 random”. Structures colored in black represent the deposited PDB structures 3QL3, 3QL0, and 4M6K, respectively.

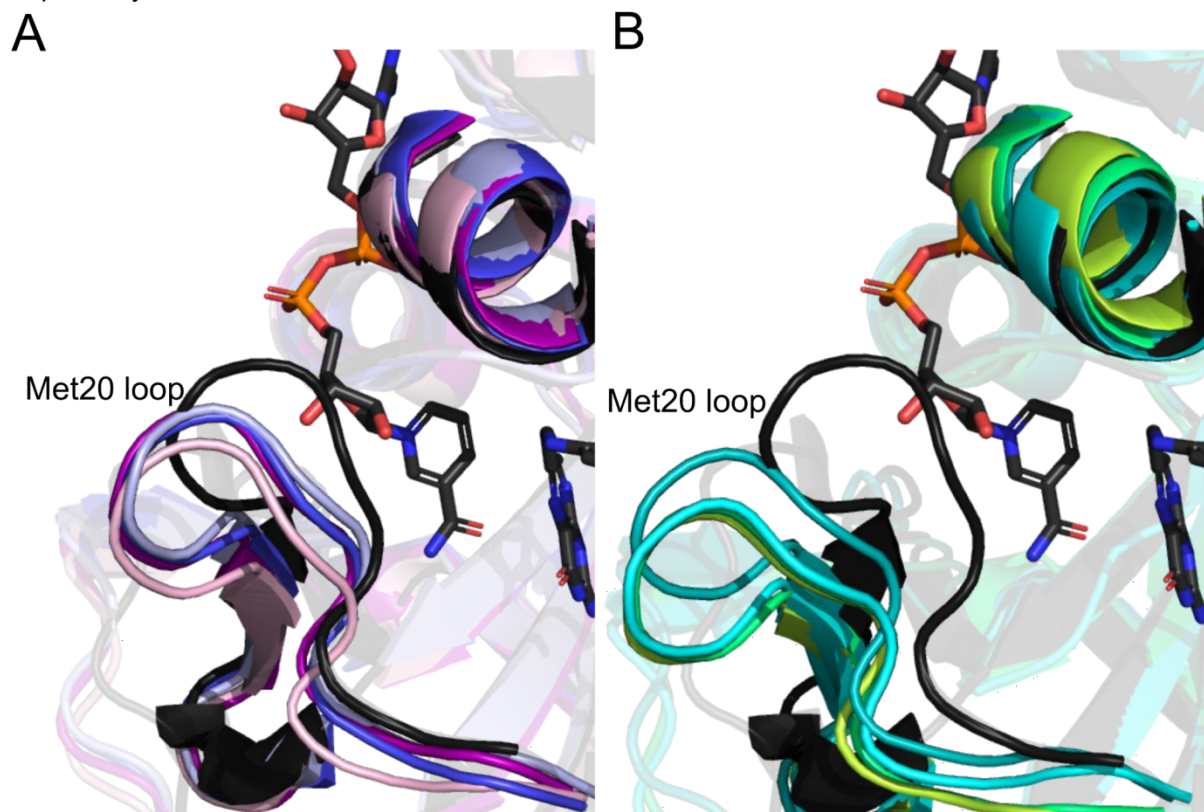

**Figure S6.** Conformations of the wild-type *ec*DHFR closely representing the more native state (**A**) and open state (**B**) of the Met20 loop during the simulation. Structures were obtained by *cpptraj* K-means algorithm clustering using the options “cluster c1 kmeans clusters 2 randompoint maxit 500 rms :1-159@C,N,O,CA,CB&!@H= sieve 10 random” at time points where the RMSD fluctuations (**Figure S1**) were above (**A**) (at around 5-13ns and 18-20ns) or below  $\sim 1.8\text{\AA}$  (at around 14-18ns) (**B**). Structures colored in black represent the deposited 3QL3 PDB structure.

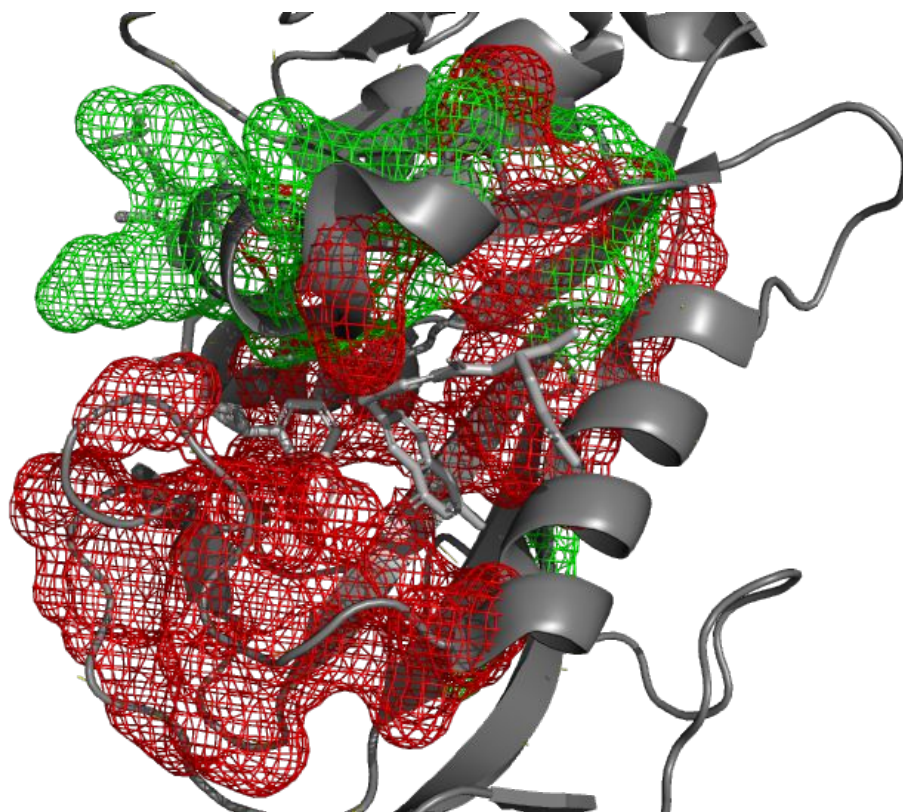

**Figure S7** IC2 (green) and IC3 (red) identified by removing all sequences with less than 40% identity to human DHFR and re-computing the SCA matrix. ICs are mapped onto human DHFR (PDB: 4M6K).
